# Supplementary material for: Remineralizing Effects of Resin-Based Dental Sealants: A Systematic Review of In Vitro Studies
Source: MDPI journal article supplement (doi:10.3390/polym14040779), 2022-02-17
Supplement: s1 [file s1]

# S1. The details of the control and intervention groups of all included studies.

| Study                        | Control Group                                                                                                                                                                                                                         | Intervention Group                                                                                                                                                                                                                                                                                                                                                                                                                                                      |
|------------------------------|---------------------------------------------------------------------------------------------------------------------------------------------------------------------------------------------------------------------------------------|-------------------------------------------------------------------------------------------------------------------------------------------------------------------------------------------------------------------------------------------------------------------------------------------------------------------------------------------------------------------------------------------------------------------------------------------------------------------------|
| Ibrahim et al., 2020<br>[33] | <ul style="list-style-type: none"> <li>- Negative Control (no sealant application)</li> <li>- Control Sealant (base formulation)</li> </ul> 50 wt% PEHB (44.5% PMGDM + 39.5 EBPADMA + 10% HEMA + 5% Bis-GMA + 1% BAPO) + 50 wt% Glass | <ul style="list-style-type: none"> <li>- 50 wt% PEHB + 20 wt% nACP + 30 wt% Glass</li> <li>- 45 wt% PEHB + 20 wt% nACP + 30 wt% Glass + 5 wt% DMAHDM</li> </ul>                                                                                                                                                                                                                                                                                                         |
| Yang et al., 2020 [34]       | hCS 0: 50 wt% RM + 0 hCS Filler + 0 wt% CS Filler + 50 wt% silanized glass<br><br>RM: 49.5 wt % Bis-GMA + 49.5 wt % TEGDMA, + 0.3 wt% CQ, + 0.6 wt % 2(DMAEMA)                                                                        | <ul style="list-style-type: none"> <li>- hCS 12.5: (50 wt% RM + 12.5 wt% hCS + 0 wt% CS + 37.5 wt% salinized glass)</li> <li>- hCS 25.0: (50 wt% RM + 25 wt% hCS + 0 wt% CS + 25 wt% salinized glass)</li> <li>- hCS 37.5: (50 wt% RM + 37.5 wt% hCS + 0 wt% CS + 12.5 wt% salinized glass)</li> <li>- hCS 50.0: (50 wt% RM + 50 wt% hCS + 0 wt% CS + 0 wt% Salinized glass)</li> <li>- CS 50.0: (50 wt% RM + 0 wt% hCS + 50 wt% CS + 0 wt% salinized glass)</li> </ul> |
| Bohns et al., 2019<br>[35]   | SCG: 90 wt% TEGDMA + 10 wt% Bis-GMA + 1 mol% CQ and 1 mol% EDAB                                                                                                                                                                       | <ul style="list-style-type: none"> <li>- SBNNT0.1%: 90 wt% TEGDMA + 10 wt% Bis-GMA + 1 mol% CQ and 1 mol% EDAB + 0.1% Hexagonal BNNTs</li> <li>- SBNNT0.2%: 90 wt% TEGDMA + 10 wt% Bis-GMA + 1 mol% CQ and 1 mol% EDAB + 0.2% Hexagonal BNNT</li> </ul>                                                                                                                                                                                                                 |
| Bohns et al., 2019<br>[36]   | SCG: 90 wt% (TEGDMA) + 10 wt% (BisGMA) + 1 mol% (CQ) + 1 mol% (EDAB)                                                                                                                                                                  | <ul style="list-style-type: none"> <li>- SHAp: 90 wt% (TEGDMA) + 10 wt% (BisGMA)+ 1 mol% (CQ) + 1 mol% (EDAB) + 10 wt% Ca10(PO4)6(OH)2</li> <li>- Sα-TCP: 90 wt% (TEGDMA) + 10 wt% (BisGMA)+ 1 mol% (CQ) + 1 mol% (EDAB) + 10 wt% α-Ca3(PO4)2</li> <li>- SOCP: 90 wt% (TEGDMA) + 10 wt% (BisGMA)+ 1 mol% (CQ) + 1 mol% (EDAB) + 10 wt% Ca8(HPO4)2(PO4)4·5H2O</li> </ul>                                                                                                 |
| Sadabad et al., 2019 [37]    | <ul style="list-style-type: none"> <li>- Master-Dent</li> <li>- Negative Control (no sealant application)</li> </ul>                                                                                                                  | Embrac Wetbond                                                                                                                                                                                                                                                                                                                                                                                                                                                          |
| Şişmanoğlu et al., 2019 [38] |                                                                                                                                                                                                                                       | <ul style="list-style-type: none"> <li>- Clinpro</li> <li>- Helioclear F</li> <li>- Fissurit F</li> <li>- BeautiSealant</li> </ul>                                                                                                                                                                                                                                                                                                                                      |
| Khudanov et al., 2018 [39]   | <ul style="list-style-type: none"> <li>- Argecem</li> <li>- Helioclear</li> </ul>                                                                                                                                                     | <ul style="list-style-type: none"> <li>- Fisskheim</li> <li>- Fissurelight</li> <li>- Helioclear F</li> </ul>                                                                                                                                                                                                                                                                                                                                                           |
| Ibrahim et al., 2018<br>[40] | Virtuoso                                                                                                                                                                                                                              | <ul style="list-style-type: none"> <li>- FluroShield</li> <li>- 5% DMAHDM + 0% nACP:</li> <li>- (45% PEHB + 5% DMAHDM + 50% Glass + 0% NACP)</li> <li>- 5% DMAHDM + 10% nACP:</li> </ul>                                                                                                                                                                                                                                                                                |

|                                      |                                                                                                                                                                                       |                                                                                                                                                                                                                                                                                                                                                                                                                                               |
|--------------------------------------|---------------------------------------------------------------------------------------------------------------------------------------------------------------------------------------|-----------------------------------------------------------------------------------------------------------------------------------------------------------------------------------------------------------------------------------------------------------------------------------------------------------------------------------------------------------------------------------------------------------------------------------------------|
|                                      |                                                                                                                                                                                       | <ul style="list-style-type: none"> <li>- (45% PEHB + 5% DMAHDM + 40% Glass + 10% NACP)</li> <li>- 5% DMAHDM + 20% nACP: (45% PEHB + 5% DMAHDM + 30% Glass + 20% nACP)</li> <li>- 5% DMAHDM + 30% nACP: (45% PEHB + 5% DMAHDM + 20% Glass + 30% nACP)</li> </ul>                                                                                                                                                                               |
| Utneja et al., 2018<br>[27]          | <ul style="list-style-type: none"> <li>- Clinpro (unfilled)</li> <li>- 35.5 wt% Bis-GMA + 35.5 wt% TEGDMA + 28%wt HEMA + 0.8 wt% 4E + 0.2 wt% CQ + 0 wt% filler (unfilled)</li> </ul> | <ul style="list-style-type: none"> <li>- Delton FS plus</li> <li>- Aegis</li> <li>- 35.5 wt% Bis-GMA + 35.5 wt% TEGDMA + 28%wt HEMA + 0.8 wt% 4E + 0.2 wt% CQ + 30 wt% nHAP filler</li> <li>- 35.5 wt% Bis-GMA + 35.5 wt% TEGDMA + 28%wt HEMA + 0.8 wt% 4E + 0.2 wt% CQ + 10 wt% nHAP+20 wt% silica filler</li> <li>- 35.5 wt% Bis-GMA + 35.5 wt% TEGDMA + 28%wt HEMA + 0.8 wt% 4E + 0.2 wt% CQ + 10 wt% nHAP + 20 wt% nACP filler</li> </ul> |
| Zin El et al., 2018<br>[28]          | <ul style="list-style-type: none"> <li>- Fuji VII</li> <li>- G bond Plus</li> <li>- Estelite flow Quick</li> </ul>                                                                    | <ul style="list-style-type: none"> <li>- Teethmate F-1</li> <li>- Clinpro</li> </ul>                                                                                                                                                                                                                                                                                                                                                          |
| Kosior et al., 2017<br>[21]          |                                                                                                                                                                                       | <ul style="list-style-type: none"> <li>- Con Seal F</li> <li>- Fissurit FX</li> <li>- Delton FS+</li> <li>- Admira Seal</li> </ul>                                                                                                                                                                                                                                                                                                            |
| Nakamura et al., 2017<br>[20]        | <ul style="list-style-type: none"> <li>- Negative Control (no sealant application)</li> <li>- Fuji III LC</li> </ul>                                                                  | <ul style="list-style-type: none"> <li>- Teethmate F-1</li> <li>- BeautiSealant</li> </ul>                                                                                                                                                                                                                                                                                                                                                    |
| Surintanasarn et al., 2017<br>[41]   | Concise sealant without filler                                                                                                                                                        | <ul style="list-style-type: none"> <li>- Concise sealant + 5 wt% mesoporous silica</li> <li>- Concise sealant + 5 wt% calcium carbonate</li> <li>- Concis sealant + 5 wt% Fluoro-alumino silicate</li> </ul>                                                                                                                                                                                                                                  |
| Dionysopoulps et al., 2016<br>[18]   | FX-II                                                                                                                                                                                 | <ul style="list-style-type: none"> <li>- Teethmate F-1</li> <li>- Fissurit F</li> <li>- BeautiSealant</li> </ul>                                                                                                                                                                                                                                                                                                                              |
| Munhoz et al., 2016<br>[42]          | <ul style="list-style-type: none"> <li>- VITRO FIL</li> <li>- VITRO SEAL ALPHA</li> </ul>                                                                                             | <ul style="list-style-type: none"> <li>- ALPHA SEAL – AUTO</li> <li>- ALPHA SEAL – LIGHT</li> </ul>                                                                                                                                                                                                                                                                                                                                           |
| Salmerón-Valdés et al., 2016<br>[43] |                                                                                                                                                                                       | <ul style="list-style-type: none"> <li>- BeautiSealant</li> <li>- Clinpro</li> <li>- Helioseal F</li> <li>- UltraSeal XT</li> </ul>                                                                                                                                                                                                                                                                                                           |
| Zawaideh et al., 2016<br>[19]        | Concise™                                                                                                                                                                              | <ul style="list-style-type: none"> <li>- Aegis</li> <li>- Con Seal-F™</li> </ul>                                                                                                                                                                                                                                                                                                                                                              |

|                                 |                                                                                                                                                                                                                         |                                                                                                                                                                                                                                                                                                                                                                                                                                                                                                                                                                                                                                                                                                                                                                                   |
|---------------------------------|-------------------------------------------------------------------------------------------------------------------------------------------------------------------------------------------------------------------------|-----------------------------------------------------------------------------------------------------------------------------------------------------------------------------------------------------------------------------------------------------------------------------------------------------------------------------------------------------------------------------------------------------------------------------------------------------------------------------------------------------------------------------------------------------------------------------------------------------------------------------------------------------------------------------------------------------------------------------------------------------------------------------------|
| Hojjati et al., 2014<br>[44]    | <ul style="list-style-type: none"> <li>- Concise</li> <li>- Control: 70 wt% BIS-GMA + 30 wt% TEGDMA + 0.5 wt% DMAEMA+ 0.5 wt%CQ + 7 wt% Silanized Silica</li> </ul>                                                     | <ul style="list-style-type: none"> <li>- 1 wt% <math>\beta</math>-TCP-NPs</li> <li>- 2 wt% <math>\beta</math>-TCP-NPs</li> <li>- 3 wt% <math>\beta</math>-TCP-NPs</li> <li>- 4 wt% <math>\beta</math>-TCP-NPs</li> <li>- 5 wt% <math>\beta</math>-TCP-NPs</li> </ul>                                                                                                                                                                                                                                                                                                                                                                                                                                                                                                              |
| Abdel-Haffiez et al., 2013 [45] | <ul style="list-style-type: none"> <li>- Negative Control (no sealant application)</li> <li>- Fluor Protector</li> </ul>                                                                                                | Pro-Seal                                                                                                                                                                                                                                                                                                                                                                                                                                                                                                                                                                                                                                                                                                                                                                          |
| Fan et al., 2013 [46]           | SeLECT Defense                                                                                                                                                                                                          | <ul style="list-style-type: none"> <li>- Sealant containing 35% Fluoride-releasing Filler: 16.13 wt% Synthesized antibacterial fluoride releasing monomer + 6.45 wt% BisGMA + 12.90 wt% UEDMA + 12.90 wt% HDDMA + 12.90 wt% HEMA + 3.22 wt% synthesized adhesive monomer + 35 wt% silanized fluoride-releasing filler + 0.5 wt% photo- initiators</li> <li>- Sealant containing 20% Fluoride-releasing Filler + 15% Bioactive Glass: 16.13 wt% Synthesized antibacterial fluoride releasing monomer + 6.45 wt% BisGMA + 12.90 wt% UEDMA + 12.90 wt% HDDMA + 12.90 wt% HEMA + 3.22 wt% synthesized adhesive monomer + 20 wt% silanized fluoride-releasing filler + 15 wt% NovaMin bioactive glass + 0.5 wt% photo- initiators</li> <li>- FluroShield</li> <li>- Clinpro</li> </ul> |
| Kantovitz et al., 2013 [29]     | <ul style="list-style-type: none"> <li>- Sound + Heliaseal clear chroma (SH)</li> <li>- Caries-like lesion + Heliaseal clear chroma (CH)</li> <li>- Caries + topical fluoride + Heliaseal clear chroma (CFH)</li> </ul> | <ul style="list-style-type: none"> <li>- Sound + FluroShield ( SF)</li> <li>- Caries-like lesion + FluroShield (CF)</li> <li>- Caries + topical fluoride + FluroShield (CFF)</li> </ul>                                                                                                                                                                                                                                                                                                                                                                                                                                                                                                                                                                                           |
| Yang et al., 2013 [47]          | <ul style="list-style-type: none"> <li>- BAG0: 50 wt% RM + 0 wt% 45S5 BAG filler + 50 wt% silanized dental glass filler</li> <li>- RM= Bis-GMA/TEGDMA 50/50 (wt%) containing 1% of DMAEMA/CQ 2:1 (wt%)</li> </ul>       | <ul style="list-style-type: none"> <li>- BAG12.5: 50 wt% RM + 12.5 wt% 45S5 BAG filler + 37.5 wt% silanized dental glass filler</li> <li>- BAG25: 50 wt% RM + 25 wt% 45S5 BAG filler + 25 wt% silanized dental glass filler</li> <li>- BAG37.5: 50 wt% RM + 37.5 wt% 45S5 BAG filler + 12.5 wt% silanized dental glass filler</li> <li>- BAG50: 50 wt% RM + 50 wt% 45S5 BAG filler + 0 wt% silanized dental glass filler</li> </ul>                                                                                                                                                                                                                                                                                                                                               |
| Choudhary et al., 2012 [48]     | Concise                                                                                                                                                                                                                 | <ul style="list-style-type: none"> <li>- Aegis.</li> <li>- Teethmate F1</li> </ul>                                                                                                                                                                                                                                                                                                                                                                                                                                                                                                                                                                                                                                                                                                |
| Prabhakar et al., 2012 [30]     | <ul style="list-style-type: none"> <li>- Heliaseal</li> <li>- Fuji VII™</li> </ul>                                                                                                                                      | <ul style="list-style-type: none"> <li>- Guardian Seal™</li> </ul>                                                                                                                                                                                                                                                                                                                                                                                                                                                                                                                                                                                                                                                                                                                |
| Shimazu et al., 2011<br>[49]    |                                                                                                                                                                                                                         | <ul style="list-style-type: none"> <li>- BeautiSealant</li> <li>- Deltion FS+</li> <li>- Teethmate F-12.0</li> </ul>                                                                                                                                                                                                                                                                                                                                                                                                                                                                                                                                                                                                                                                              |
| Kaga et al., 2011 [50]          | Fuji III LC                                                                                                                                                                                                             | <ul style="list-style-type: none"> <li>- S-PRG filler containing FS: UDMA + TEGDMA+ S-PRG filler</li> <li>- Delton FS+</li> </ul>                                                                                                                                                                                                                                                                                                                                                                                                                                                                                                                                                                                                                                                 |

- Teethmate F-12.0

|                                    |                                                                        |                                                                                                                                                                                                                                                                                             |
|------------------------------------|------------------------------------------------------------------------|---------------------------------------------------------------------------------------------------------------------------------------------------------------------------------------------------------------------------------------------------------------------------------------------|
| Wang et al., 2011<br>[51]          | - Control: UDMA + TEGDMA + Silica oxide filler<br>- Fuji III LC        | - BeautiSealant<br>- DELTON FS<br>- Teethmate F - 1 2.0                                                                                                                                                                                                                                     |
| AlSaffar et al., 2010<br>[52]      | - Fuji Triage<br>- Delton Opaque                                       | - UltraSeal XT plus<br>- Clinpro<br>- Aegis                                                                                                                                                                                                                                                 |
| Bayrak et al., 2010<br>[53]        | - Fuji VII<br>- Fuji II LC                                             | - Fissurit F<br>- Ionosit<br>- Aelite Flo                                                                                                                                                                                                                                                   |
| Shen et al., 2010 [54]             |                                                                        | - 2Ca/ 8CHX (70 wt% UDMA+30 wt% TEGDMA + CaF2/CHXDA were prepared with weight ratios of 2/8)<br>- 5Ca/5CHX (70 wt% UDMA+30 wt% TEGDMA + CaF2/CHXDA were prepared with weight ratios of 5/5)<br>- 8Ca/2CHX (70 wt% UDMA+30 wt% TEGDMA + CaF2/CHXDA were prepared with weight ratios of 8/28) |
| Kuşgöz et al., 2010<br>[55]        | Fuji Triage                                                            | - Clinpro<br>- Grandio Seal                                                                                                                                                                                                                                                                 |
| Motohashi et al., 2010 [56]        | - FujiIII<br>- Negative Control (no sealant application)               | Teethmate-F1                                                                                                                                                                                                                                                                                |
| Silva et al., 2010 [57]            |                                                                        | - Fluroshield<br>- Aegis<br>- Experimental sealant containing fluoride<br>- Experimental sealant containing ACP and fluoride                                                                                                                                                                |
| Cildir et al., 2007<br>[58]        | - Fuji VII<br>- Ketac Molar                                            | - Clinpro<br>- Embrace                                                                                                                                                                                                                                                                      |
| Salar et al., 2007 [31]            | - Delton<br>- Fuji Triage                                              | ProSeal                                                                                                                                                                                                                                                                                     |
| Lobo et al., 2005 [32]             | - Negative Control (no sealant application)<br>- Concise<br>- Vitremer | Clinpro                                                                                                                                                                                                                                                                                     |
| Loyola-Rodriguez et al., 1996 [59] | Helioseal                                                              | - FluoroShield<br>- Teethmate-FIM                                                                                                                                                                                                                                                           |

Roberts et al., 1984 [60] Delton + 0.0% Sodium fluoride

- Delton + 0.1% Sodium fluoride
- Delton + 0.25% Sodium fluoride
- Delton + 1.0% Sodium fluoride
- Delton + 2.5% Sodium fluoride

Swartz et al., 1976 [61]

- Nuva Seal
- Eposylite
- Exp.BIS-GMA
- Exp.cyanoacrylate.

ACP: Amorphous calcium phosphate. RM: Resin Matrix. DMAHDM: Dimethylaminohexadecyl methacrylate. PMGDM: Pyromellitic glycerol dimethacrylate. EBPADMA: Ethoxylated bisphenol A dimethacrylate. HEMA: 2-Hydroxyethyl methacrylate. Bis-GMA: Bisphenol A glycidyl dimethacrylate. BAPO: Phenyl-bis (2,4,6- trimethyl benzoyl)-phosphine oxide. hCS: Hydrated calcium silicate. CS: calcium silicate cement. HAP: hydroxyapatite. TEGMA: Triethylene glycol monomethacrylate. UDMA: Urethane dimethacrylate. TEGDMA: Triethylene glycol dimethacrylate. CQ: Camphorquinone. BNNT: Boron-nitride nanotubes. S-PRG: Surface reaction-type pre-reacted glass ionomer. CaPs: Calcium phosphate. 4E: Ethyl 4-N, N-dimethylaminobenzoate. nACP: Nano amorphous calcium phosphate.

## S2. The details of the protocol of all included studies.

| Study                        | Summary of Protocol                                                                                                                                        |
|------------------------------|------------------------------------------------------------------------------------------------------------------------------------------------------------|
| Yang et al., 2020 [34]       | <ul style="list-style-type: none"> <li>- Lactic acid solution</li> <li>- pH=4</li> <li>- Distilled water.</li> <li>- pH=6.5</li> <li>- 28 days</li> </ul>  |
| Şişmanoğlu et al., 2019 [38] | <ul style="list-style-type: none"> <li>- polyethylene vials with 5 ml of deionized water</li> <li>- For 28 days</li> <li>- at 37°C</li> <li>- +</li> </ul> |
| Khudanov et al., 2018 [39]   | <ul style="list-style-type: none"> <li>- Distilled water</li> <li>- 21 days</li> </ul>                                                                     |
| Ibrahim et al., 2018 [40]    | <ul style="list-style-type: none"> <li>- Sodium chloride</li> <li>- pH=4</li> <li>- 70 days</li> </ul>                                                     |
| Utneja et al., 2018 [27]     | <ul style="list-style-type: none"> <li>- Sodium chloride</li> <li>- pH=4, 5.5 and 7.4</li> <li>- 21 days</li> </ul>                                        |

|                                              |                                                                                                     |
|----------------------------------------------|-----------------------------------------------------------------------------------------------------|
| Zin EI et al., 2018 <sup>[28]</sup>          | <ul style="list-style-type: none"> <li>- Deionized water</li> <li>- 15 days</li> <li>- +</li> </ul> |
| Kosior et al., 2017 <sup>[21]</sup>          | <ul style="list-style-type: none"> <li>- Saline</li> <li>- 14 weeks</li> <li>- +</li> </ul>         |
| Nakamura et al., 2017 <sup>[20]</sup>        | <ul style="list-style-type: none"> <li>- Deionized water</li> <li>- 5 weeks</li> <li>- +</li> </ul> |
| Surintanasarn et al., 2017 <sup>[41]</sup>   | <ul style="list-style-type: none"> <li>- Deionized water</li> <li>- 27 days</li> <li>- +</li> </ul> |
| Dionysopoulos et al., 2016 <sup>[18]</sup>   | <ul style="list-style-type: none"> <li>- Deionized water</li> <li>- 28 days</li> </ul>              |
| Munhoz et al., 2016 <sup>[42]</sup>          | <ul style="list-style-type: none"> <li>- Deionized water</li> <li>- 15 days</li> </ul>              |
| Salmerón-Valdés et al., 2016 <sup>[43]</sup> | <ul style="list-style-type: none"> <li>- Deionized water</li> <li>- 60 days</li> <li>- +</li> </ul> |
| Fan et al., 2013 <sup>[46]</sup>             | <ul style="list-style-type: none"> <li>- Deionized water</li> <li>- 14 days</li> <li>- +</li> </ul> |
| Shimazu et al., 2011 <sup>[49]</sup>         | <ul style="list-style-type: none"> <li>- Distilled water</li> <li>- 15 days</li> <li>- +</li> </ul> |
| Kaga et al., 2011 <sup>[50]</sup>            | <ul style="list-style-type: none"> <li>- Distilled water</li> <li>- 84 days</li> <li>- +</li> </ul> |
| Wang et al., 2011 <sup>[51]</sup>            | <ul style="list-style-type: none"> <li>- Latic acid.</li> <li>- pH=4</li> <li>- 1 day</li> </ul>    |
| Bayrak et al., 2010 <sup>[53]</sup>          | <ul style="list-style-type: none"> <li>- Ultrapure water</li> <li>- 21 days</li> <li>- +</li> </ul> |

|                                                                                                            |                                                                                                                                                                                        |
|------------------------------------------------------------------------------------------------------------|----------------------------------------------------------------------------------------------------------------------------------------------------------------------------------------|
| Shen et al., 2010 <sup>[54]</sup>                                                                          | <ul style="list-style-type: none"> <li>- Sodium acetate-acetic acid buffer</li> <li>- PH 4.0, 5.0, and 6.0</li> <li>- 120 days</li> </ul>                                              |
| Kuşgöz et al., 2010 <sup>[55]</sup>                                                                        | <ul style="list-style-type: none"> <li>- Ultrapure water</li> <li>- 21 days</li> <li>- +</li> </ul>                                                                                    |
| Silva et al., 2010 <sup>[57]</sup>                                                                         | Not mentioned.                                                                                                                                                                         |
| Motohashi et al., 2010 <sup>[56]</sup>                                                                     | <ul style="list-style-type: none"> <li>- lactic acid</li> <li>- pH=5.7</li> <li>- 14 days</li> </ul>                                                                                   |
| Cildir et al., 2007 <sup>[58]</sup>                                                                        | <ul style="list-style-type: none"> <li>- Distilled deionized water</li> <li>- 28 days</li> <li>- +</li> </ul>                                                                          |
| Lobo et al., 2005 <sup>[32]</sup>                                                                          | <ul style="list-style-type: none"> <li>- Demineralizing solution 6h</li> <li>- pH=4.3</li> <li>- Remineralizing solution 18h</li> <li>- pH=7</li> <li>- 5 days</li> <li>- +</li> </ul> |
| Loyola-Rodriquez et al., 1996 <sup>[59]</sup>                                                              | <ul style="list-style-type: none"> <li>- Double distilled deionized water</li> <li>- 7 days</li> <li>- +</li> </ul>                                                                    |
| Roberts et al., 1984 <sup>[60]</sup>                                                                       | <ul style="list-style-type: none"> <li>- Distilled water</li> <li>- 180 days</li> <li>- +</li> </ul>                                                                                   |
| Swartz et al., 1976 <sup>[61]</sup>                                                                        | <ul style="list-style-type: none"> <li>- Distilled water</li> <li>- 4 days</li> </ul>                                                                                                  |
| + : This study measured the ions release at multiple timepoints, but not all timepoints are reported here. |                                                                                                                                                                                        |
